# Supplementary material
Source: PubMed Central journal article supplement (PMC8446334)
Supplement: NIHMS1735284-supplement-STable_1.pdf [file NIHMS1735284-supplement-STable_1.pdf]

**Supplementary Table 1.**

Estimated change in life expectancy at birth ( $e_0$ ) in 2020 based on the difference in  $e_0$  from life tables calculated for 2019 and 2020. Estimates by sex and state, based on the total number of deaths reported in 2019 and 2020.

| Region       | State | Total       |             |                         |          | Male        |             |                         |          | Female      |             |                         |          |
|--------------|-------|-------------|-------------|-------------------------|----------|-------------|-------------|-------------------------|----------|-------------|-------------|-------------------------|----------|
|              |       | $e_0, 2019$ | $e_0, 2020$ | $e_0, 2019 - e_0, 2020$ | % change | $e_0, 2019$ | $e_0, 2020$ | $e_0, 2019 - e_0, 2020$ | % change | $e_0, 2019$ | $e_0, 2020$ | $e_0, 2019 - e_0, 2020$ | % change |
| North        | RO    | 76.37       | 74.25       | 2.12                    | 2.78     | 73.71       | 71.33       | 2.38                    | 3.23     | 79.42       | 77.59       | 1.83                    | 2.31     |
|              | AC    | 75.08       | 73.29       | 1.79                    | 2.38     | 71.49       | 69.58       | 1.90                    | 2.66     | 79.14       | 77.64       | 1.50                    | 1.89     |
|              | AM    | 75.37       | 71.90       | 3.46                    | 4.60     | 71.90       | 68.49       | 3.42                    | 4.75     | 79.17       | 75.89       | 3.28                    | 4.14     |
|              | RR    | 73.66       | 70.98       | 2.68                    | 3.64     | 70.66       | 68.23       | 2.43                    | 3.44     | 77.30       | 74.36       | 2.94                    | 3.80     |
|              | PA    | 75.97       | 73.25       | 2.71                    | 3.57     | 72.56       | 69.75       | 2.81                    | 3.87     | 79.68       | 77.27       | 2.40                    | 3.02     |
|              | AP    | 75.42       | 72.24       | 3.18                    | 4.21     | 72.41       | 68.44       | 3.97                    | 5.48     | 78.72       | 76.80       | 1.92                    | 2.43     |
|              | TO    | 76.81       | 75.62       | 1.18                    | 1.54     | 73.81       | 72.31       | 1.50                    | 2.03     | 80.16       | 79.45       | 0.71                    | 0.89     |
| Northeast    | MA    | 77.27       | 74.72       | 2.55                    | 3.30     | 73.66       | 70.73       | 2.93                    | 3.98     | 81.02       | 79.10       | 1.92                    | 2.37     |
|              | PI    | 75.93       | 74.50       | 1.43                    | 1.89     | 72.53       | 70.53       | 2.00                    | 2.76     | 79.29       | 78.55       | 0.73                    | 0.92     |
|              | CE    | 76.66       | 74.36       | 2.30                    | 2.99     | 73.25       | 70.22       | 3.02                    | 4.13     | 79.99       | 78.61       | 1.39                    | 1.73     |
|              | RN    | 76.79       | 75.72       | 1.08                    | 1.40     | 72.99       | 71.74       | 1.25                    | 1.72     | 80.56       | 79.74       | 0.82                    | 1.02     |
|              | PB    | 76.19       | 74.97       | 1.22                    | 1.60     | 72.83       | 71.25       | 1.58                    | 2.17     | 79.42       | 78.64       | 0.78                    | 0.98     |
|              | PE    | 75.27       | 73.39       | 1.88                    | 2.50     | 71.49       | 69.42       | 2.07                    | 2.90     | 78.89       | 77.29       | 1.59                    | 2.02     |
|              | AL    | 74.86       | 73.02       | 1.84                    | 2.46     | 71.41       | 69.04       | 2.37                    | 3.32     | 78.14       | 76.96       | 1.18                    | 1.51     |
|              | SE    | 75.29       | 73.69       | 1.59                    | 2.12     | 71.34       | 69.39       | 1.95                    | 2.74     | 79.18       | 78.07       | 1.10                    | 1.39     |
| Southeast    | BA    | 76.22       | 74.84       | 1.39                    | 1.82     | 72.05       | 70.46       | 1.60                    | 2.22     | 80.45       | 79.39       | 1.07                    | 1.33     |
|              | MG    | 77.74       | 77.37       | 0.37                    | 0.47     | 74.70       | 74.22       | 0.48                    | 0.64     | 80.81       | 80.58       | 0.23                    | 0.28     |
|              | ES    | 77.75       | 75.96       | 1.79                    | 2.31     | 74.14       | 72.16       | 1.99                    | 2.68     | 81.43       | 79.95       | 1.49                    | 1.83     |
|              | RJ    | 75.06       | 73.29       | 1.77                    | 2.35     | 71.36       | 69.51       | 1.86                    | 2.60     | 78.57       | 76.98       | 1.59                    | 2.02     |
| South        | SP    | 77.48       | 76.33       | 1.16                    | 1.49     | 74.26       | 72.85       | 1.41                    | 1.90     | 80.59       | 79.77       | 0.82                    | 1.02     |
|              | PR    | 77.24       | 76.64       | 0.60                    | 0.78     | 73.94       | 73.03       | 0.91                    | 1.23     | 80.59       | 80.36       | 0.23                    | 0.28     |
|              | SC    | 78.35       | 78.25       | 0.10                    | 0.13     | 75.25       | 74.78       | 0.47                    | 0.63     | 81.44       | 81.79       | -0.35                   | -0.43    |
| Central West | RS    | 77.17       | 77.24       | -0.07                   | -0.09    | 73.86       | 73.75       | 0.11                    | 0.15     | 80.40       | 80.68       | -0.28                   | -0.34    |
|              | MS    | 76.49       | 75.37       | 1.12                    | 1.47     | 73.51       | 71.97       | 1.55                    | 2.10     | 79.61       | 79.03       | 0.58                    | 0.73     |
|              | MT    | 76.20       | 73.50       | 2.70                    | 3.55     | 73.18       | 70.10       | 3.08                    | 4.21     | 79.65       | 77.45       | 2.19                    | 2.75     |
|              | GO    | 76.01       | 74.66       | 1.35                    | 1.77     | 72.86       | 71.28       | 1.57                    | 2.16     | 79.32       | 78.29       | 1.03                    | 1.30     |
| Brazil       | DF    | 79.26       | 77.11       | 2.15                    | 2.71     | 76.08       | 73.55       | 2.53                    | 3.33     | 82.17       | 80.52       | 1.65                    | 2.01     |
|              |       | 76.71       | 75.39       | 1.31                    | 1.71     | 73.29       | 71.72       | 1.57                    | 2.15     | 80.10       | 79.15       | 0.95                    | 1.19     |
