# Supplementary material
Source: PubMed Central journal article supplement (PMC8446334)
Supplement: NIHMS1735284-supplement-STable_8.pdf [file NIHMS1735284-supplement-STable_8.pdf]

### Supplementary Table 8.

Increase in life expectancy at birth ( $e_0$ ) from 2000 to 2020, and estimated percentage loss of that increase due to COVID-19, as measured by the difference in life expectancy from life tables calculated for 2019 and 2020 (shown in **Supplementary Table 1**). Estimates by sex and state, based on the total number of deaths reported in 2019 and 2020.

| Region       | State | Total                 |                       | Male                  |                       | Female                |                       |
|--------------|-------|-----------------------|-----------------------|-----------------------|-----------------------|-----------------------|-----------------------|
|              |       | Increase 2000 to 2020 | % loss (2020-2019 LT) | Increase 2000 to 2020 | % loss (2020-2019 LT) | Increase 2000 to 2020 | % loss (2020-2019 LT) |
| North        | RO    | 4.57                  | 46.54                 | 4.49                  | 53.10                 | 4.33                  | 42.32                 |
|              | AC    | 8.69                  | 20.55                 | 8.49                  | 22.40                 | 8.59                  | 17.46                 |
|              | AM    | 5.74                  | 60.35                 | 5.00                  | 68.34                 | 6.45                  | 50.86                 |
|              | RR    | 7.55                  | 35.46                 | 8.13                  | 29.90                 | 6.54                  | 44.94                 |
|              | PA    | 4.60                  | 58.98                 | 3.39                  | 82.79                 | 5.91                  | 40.68                 |
|              | AP    | 6.99                  | 45.46                 | 8.29                  | 47.86                 | 5.15                  | 37.18                 |
|              | TO    | 7.08                  | 16.71                 | 6.81                  | 22.04                 | 7.19                  | 9.90                  |
| Northeast    | MA    | 6.92                  | 36.88                 | 6.73                  | 43.52                 | 6.68                  | 28.69                 |
|              | PI    | 4.13                  | 34.69                 | 3.00                  | 66.81                 | 5.16                  | 14.20                 |
|              | CE    | 5.40                  | 42.52                 | 5.19                  | 58.26                 | 5.47                  | 25.34                 |
|              | RN    | 6.37                  | 16.89                 | 5.85                  | 21.44                 | 6.71                  | 12.26                 |
|              | PB    | 7.50                  | 16.21                 | 7.23                  | 21.85                 | 7.67                  | 10.12                 |
|              | PE    | 10.37                 | 18.14                 | 11.40                 | 18.20                 | 8.87                  | 17.95                 |
|              | AL    | 8.96                  | 20.51                 | 8.33                  | 28.51                 | 9.35                  | 12.62                 |
|              | SE    | 6.05                  | 26.33                 | 5.56                  | 35.14                 | 6.42                  | 17.17                 |
| Southeast    | BA    | 5.83                  | 23.79                 | 4.77                  | 33.49                 | 6.85                  | 15.61                 |
|              | MG    | 6.41                  | 5.74                  | 6.97                  | 6.90                  | 5.71                  | 3.99                  |
|              | ES    | 8.80                  | 20.38                 | 9.03                  | 22.00                 | 8.29                  | 17.94                 |
|              | RJ    | 7.11                  | 24.85                 | 8.39                  | 22.13                 | 5.47                  | 29.05                 |
| South        | SP    | 7.58                  | 15.28                 | 8.89                  | 15.83                 | 5.82                  | 14.13                 |
|              | PR    | 6.90                  | 8.73                  | 6.55                  | 13.89                 | 7.12                  | 3.21                  |
|              | SC    | 7.97                  | 1.27                  | 8.06                  | 5.85                  | 7.65                  | -4.54                 |
| Central West | RS    | 6.29                  | -1.14                 | 6.70                  | 1.63                  | 5.72                  | -4.85                 |
|              | MS    | 6.36                  | 17.64                 | 6.23                  | 24.82                 | 6.19                  | 9.45                  |
|              | MT    | 5.74                  | 47.08                 | 5.70                  | 54.02                 | 5.49                  | 39.91                 |
|              | GO    | 3.68                  | 36.60                 | 3.34                  | 47.17                 | 4.00                  | 25.72                 |
| Brazil       | DF    | 6.86                  | 31.30                 | 7.06                  | 35.91                 | 6.31                  | 26.20                 |
|              |       | 6.93                  | 18.92                 | 7.28                  | 21.60                 | 6.34                  | 15.01                 |
